# Supplementary material for: Stool microRNA profiles reflect different dietary and gut microbiome patterns in healthy individuals
Source: HighWire-hosted journal article supplement (doi:10.1136/gutjnl-2021-325168), 2021-07-27

## Supplementary Figure 3

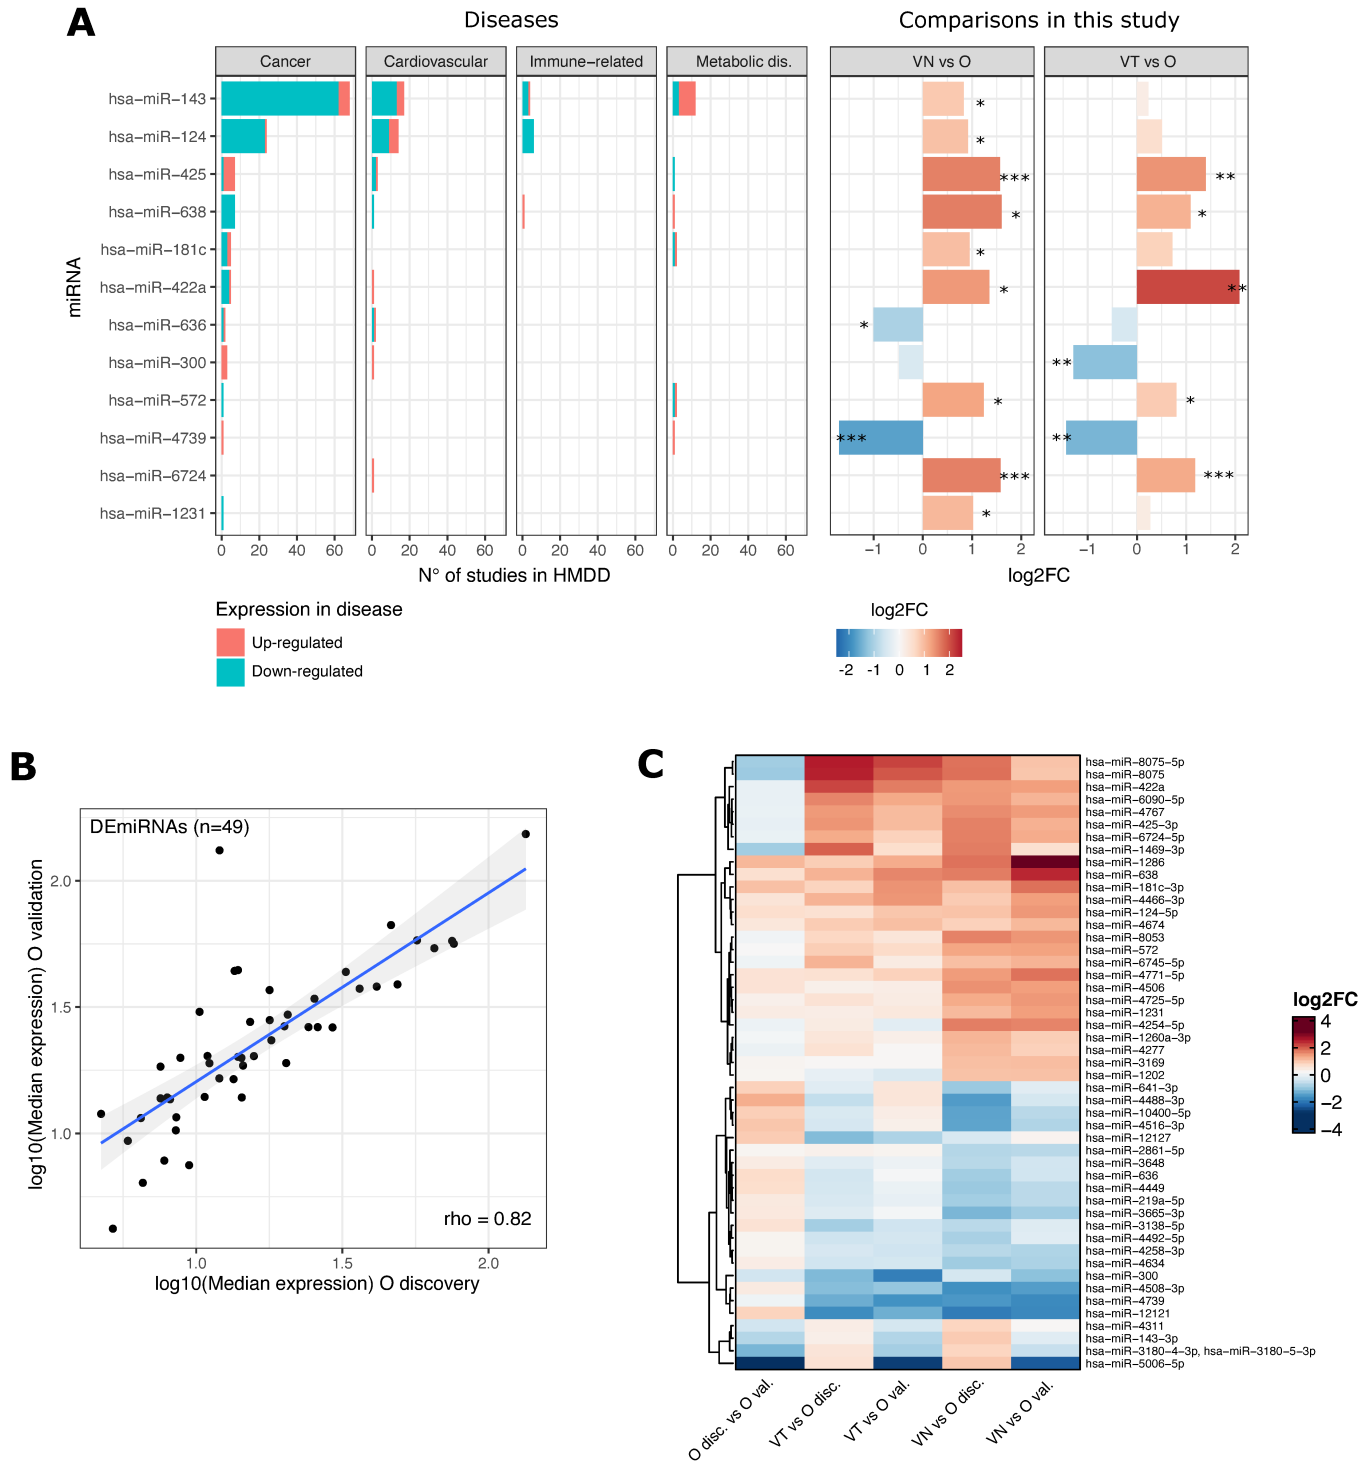

Supplement: gutjnl-2021-325168supp004_data_supplement.pdf [file gutjnl-2021-325168supp004_data_supplement.pdf]
