# Supplementary figures and images for: Stool microRNA profiles reflect different dietary and gut microbiome patterns in healthy individuals
Source: PubMed Central journal article supplement — Gut. 2021 Jul 27;71(7):1302–14. doi: 10.1136/gutjnl-2021-325168 (PMC9185830; doi:10.1136/gutjnl-2021-325168), 2021-07-27

# Supplementary Figure 1

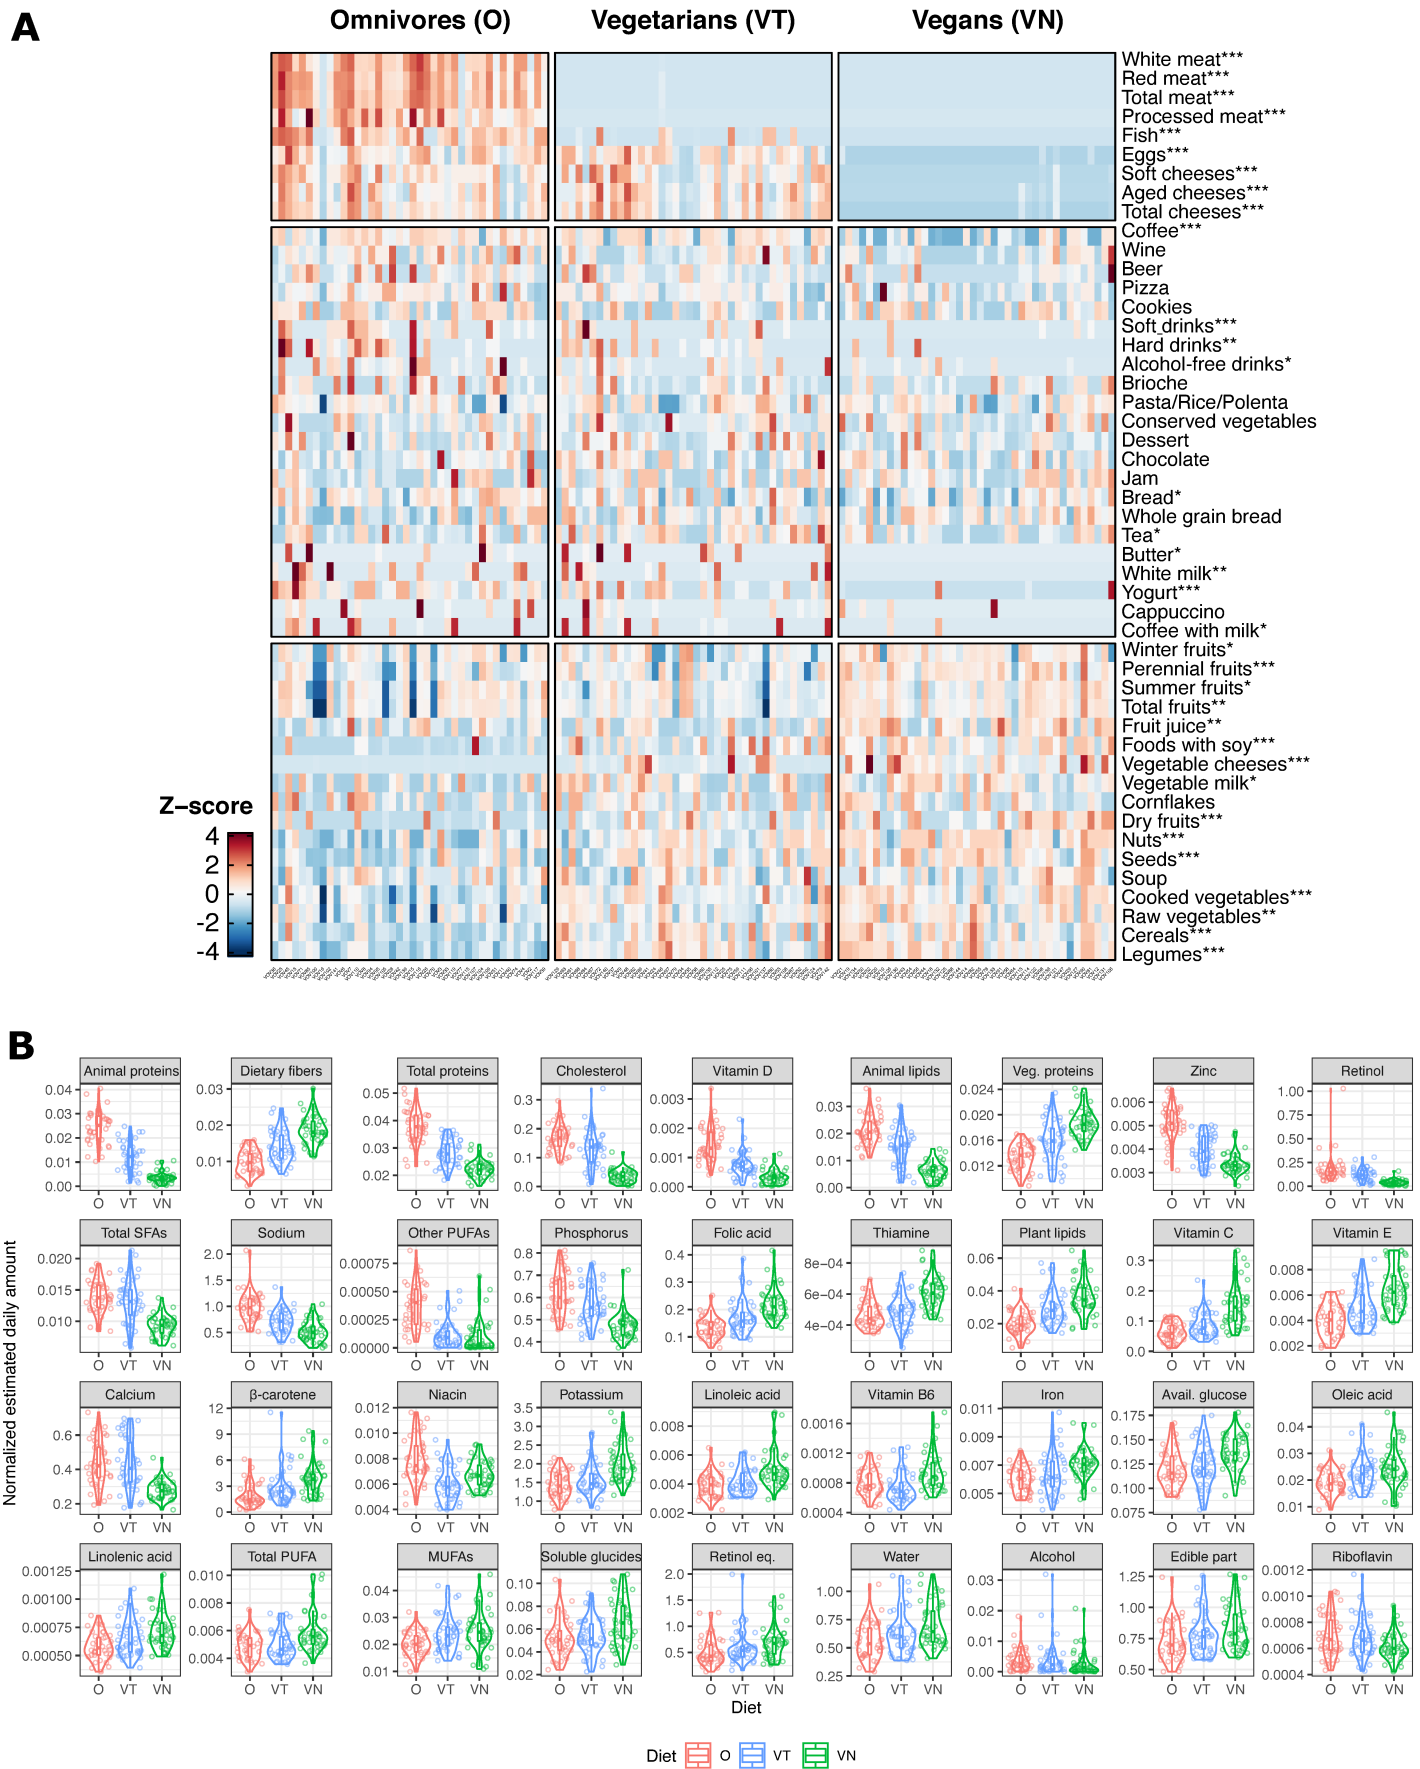

Supplement: gutjnl-2021-325168supp002.pdf [file gutjnl-2021-325168supp002.pdf]

# Supplementary Figure 2

**A**

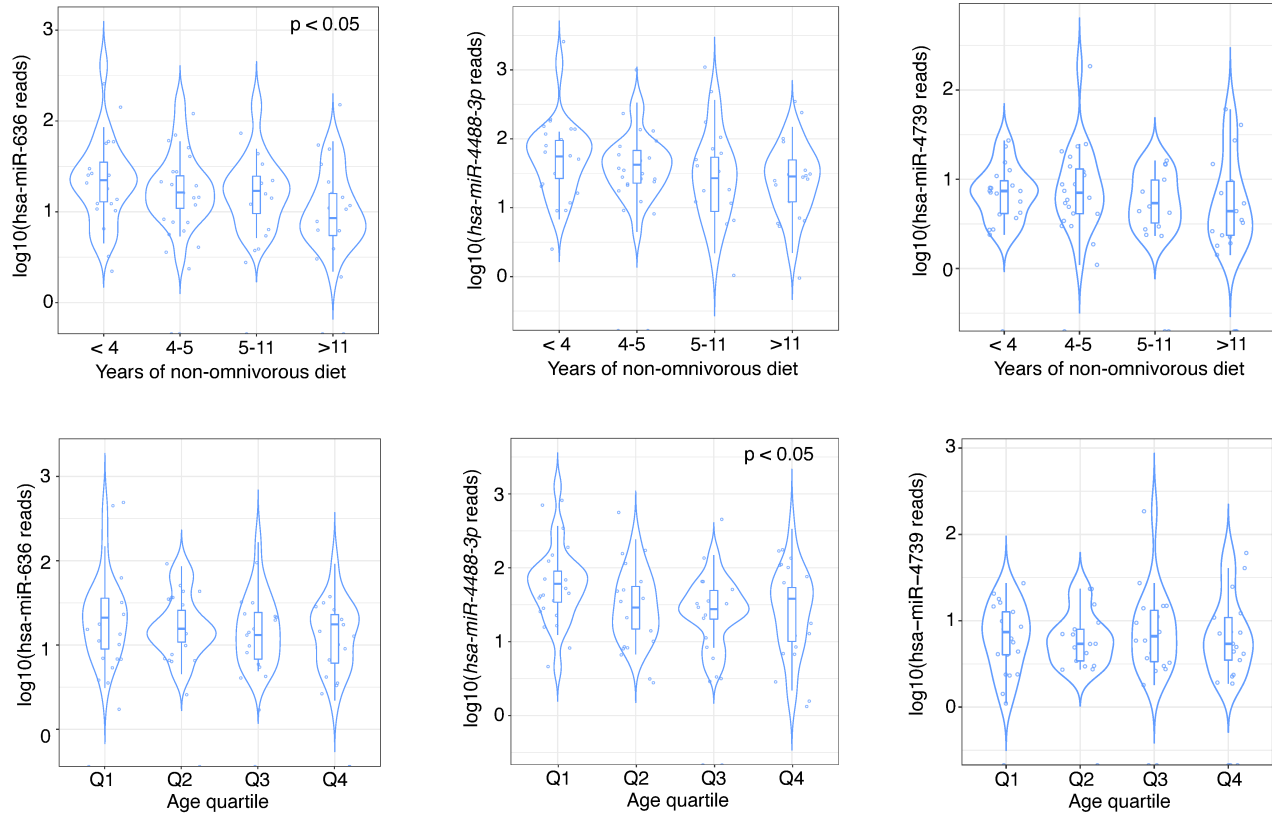

**B**

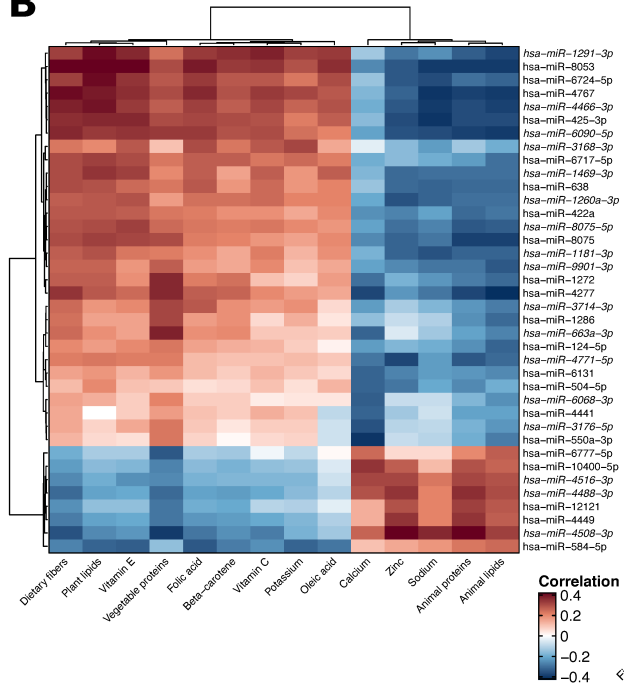

**C**

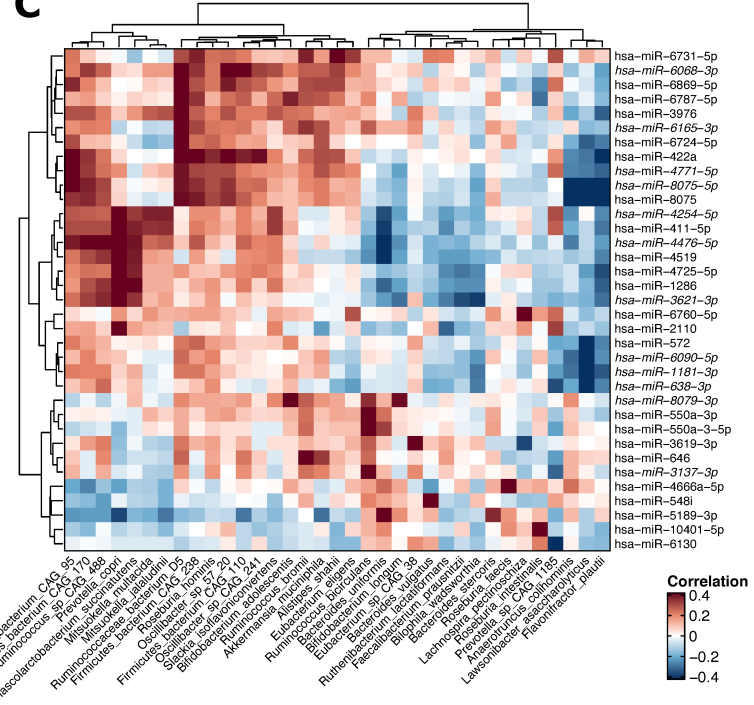

Supplement: gutjnl-2021-325168supp003.pdf [file gutjnl-2021-325168supp003.pdf]

## Supplementary Figure 4

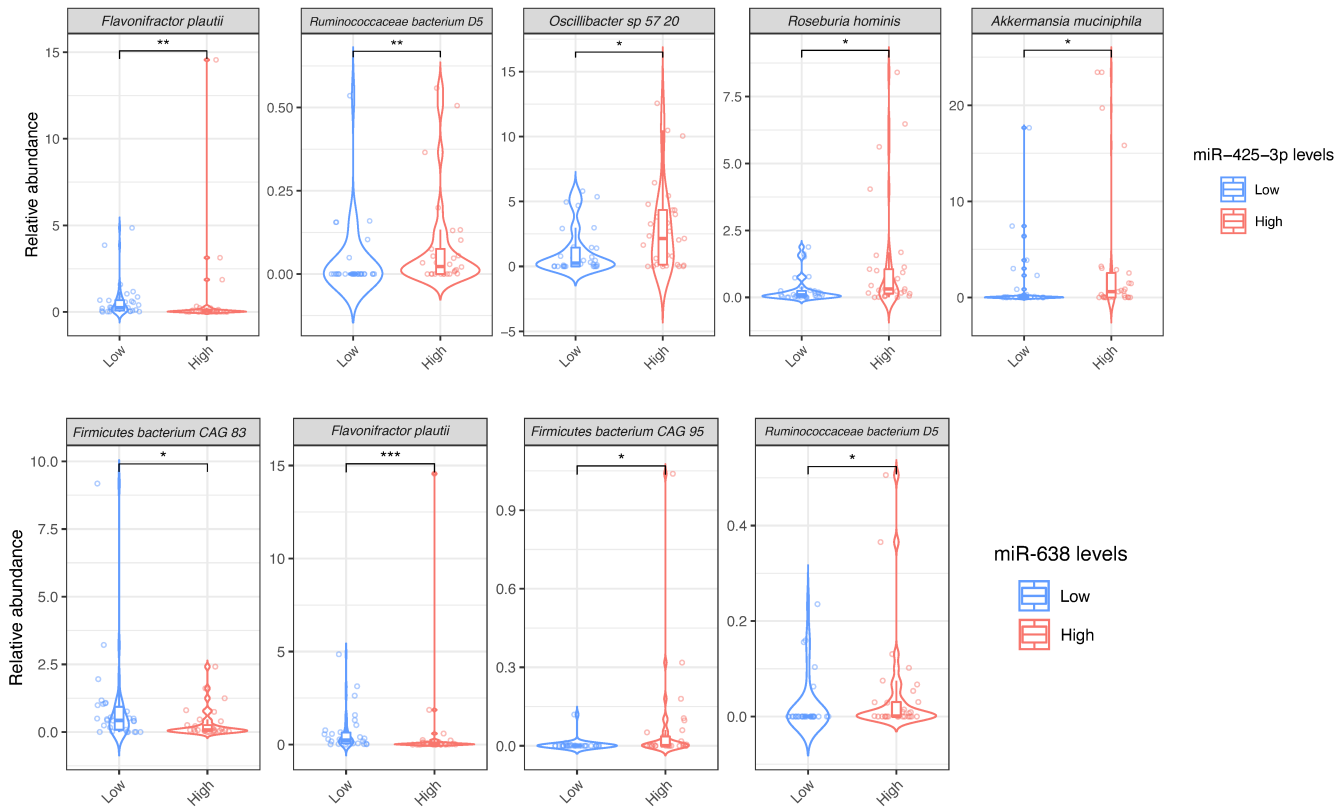

Supplement: gutjnl-2021-325168supp005.pdf [file gutjnl-2021-325168supp005.pdf]
